# Supplementary material for: The Resonance and Adaptation of Neurospora crassa Circadian and Conidiation Rhyth ms to Short Light-Dark Cycles
Source: J Fungi (Basel). 2021 Dec 29;8(1):27. doi: 10.3390/jof8010027 (PMC8780863; doi:10.3390/jof8010027)
Supplement: Supplementary file 1 [file jof-08-00027-s001.zip › File S2.xls]

## Sheet: Sheet1
Induced genes in the vvd, cry, wc-1 strain under different light intensity.
Gene	CVW-DD#1	CVW-DD#2	CVW-1000LUX#10	CVW-1000LUX#12	CVW-5000LUX#5	CVW-5000LUX#6	CVW-DD	CVW-1000LUX	CVW-5000LUX
116 elements included exclusively in "CVW-1000LUX":
NCU00105	14.7745	15.3953	23.4523	23.7607	24.2781	18.8154	15.0849	23.6065	21.5467
NCU00175	72.0895	64.0169	95.6036	109.154	83.1174	79.138	68.0532	102.379	81.1277
NCU00322	11.2494	12.8575	37.6153	45.9806	14.4011	16.2989	12.0534	41.7979	15.35
NCU00419	16.6801	13.2671	23.7465	21.9818	20.9592	20.031	14.9736	22.8642	20.4951
NCU00605	5.88055	7.11139	11.5456	9.37278	10.4936	9.00446	6.49597	10.4592	9.74904
NCU00732	5.83485	7.44237	14.555	13.6611	4.16477	4.22505	6.63861	14.108	4.19491
NCU00766	38.0048	35.7045	58.2615	58.8441	57.275	51.0453	36.8546	58.5528	54.1601
NCU00825	0.70858	1.24639	4.34412	2.68523	2.36711	2.29427	0.977483	3.51468	2.33069
NCU00855	3.34729	2.77478	8.6894	14.208	6.61279	6.63029	3.06104	11.4487	6.62154
NCU01001	28.6795	27.1807	53.2345	39.4366	40.0781	39.0688	27.9301	46.3356	39.5734
NCU01008	18.7482	12.7055	30.022	21.5827	23.4601	21.6095	15.7268	25.8024	22.5348
NCU01092	22.7709	13.8945	30.1982	32.45	15.904	16.9461	18.3327	31.3241	16.4251
NCU01107	172.401	167.909	238.61	275.066	194.066	219.486	170.155	256.838	206.776
NCU01203	11.6482	11.6928	22.3706	19.7983	18.4157	15.8382	11.6705	21.0845	17.127
NCU01259	15.0836	11.6211	23.7355	19.4462	23.4223	19.6664	13.3524	21.5908	21.5444
NCU01331	71.4849	62.1489	119.143	92.7311	91.3715	89.7578	66.8169	105.937	90.5646
NCU01430	21.6804	16.5565	27.5546	32.9597	23.0187	24.5518	19.1184	30.2571	23.7852
NCU01812	2.64955	2.3825	5.59255	4.18812	1.96658	2.99089	2.51603	4.89034	2.47874
NCU01838	80.8564	92.7579	128.304	151.919	96.052	106.452	86.8072	140.112	101.252
NCU01906	15.1857	11.2191	20.9447	25.3705	16.9077	17.9103	13.2024	23.1576	17.409
NCU02126	12.989	11.6536	22.0114	17.6547	17.99	18.556	12.3213	19.833	18.273
NCU02128	4.23554	3.85785	12.0201	9.71497	8.11435	7.96578	4.04669	10.8675	8.04006
NCU02338	9.16543	9.76633	15.2953	18.3349	12.3769	12.0679	9.46588	16.8151	12.2224
NCU02370	7.17864	9.18591	13.3478	15.8191	10.3053	12.695	8.18227	14.5835	11.5002
NCU02477	10.7401	10.0161	16.4666	16.266	16.665	14.4796	10.3781	16.3663	15.5723
NCU02690	16.7064	16.5522	24.5954	28.5728	23.1911	26.0562	16.6293	26.5841	24.6236
NCU02765	163.921	166.018	303.949	308.297	233.241	244.265	164.969	306.123	238.753
NCU03232	9.28471	9.04595	14.3078	14.4572	13.4808	13.1729	9.16533	14.3825	13.3268
NCU03406	19.3498	20.2636	32.7388	28.6557	28.5682	28.6831	19.8067	30.6972	28.6256
NCU03646	15.5711	14.1791	29.4796	31.4284	15.9599	19.837	14.8751	30.454	17.8984
NCU03803	24.6845	25.684	44.3716	41.1213	38.879	30.9268	25.1842	42.7464	34.9029
NCU04197	50.1358	40.9363	106.814	103.503	58.5114	61.3951	45.5361	105.159	59.9533
NCU04211	2.91067	2.48913	5.67382	6.01842	2.27758	3.80791	2.6999	5.84612	3.04274
NCU04295	7.96847	6.87678	13.0438	12.7932	9.82708	9.84603	7.42262	12.9185	9.83656
NCU04415	63.2294	70.7966	88.3188	113.559	86.9406	93.8887	67.013	100.939	90.4147
NCU04435	36.6078	34.3823	58.3578	54.119	42.3646	46.5108	35.4951	56.2384	44.4377
NCU04436	6.10495	5.1902	10.2381	9.54422	5.27931	5.40987	5.64757	9.89117	5.34459
NCU04455	4.14953	4.80587	9.04054	6.60221	7.02346	7.17959	4.4777	7.82137	7.10152
NCU04635	25.9752	26.3191	40.1274	44.1855	41.5361	32.903	26.1471	42.1565	37.2196
NCU04951	1222.63	1323.23	2174.08	1948.47	1372.23	1446.89	1272.93	2061.28	1409.56
NCU05004	6.1186	5.1417	11.8642	12.0895	5.42809	8.05683	5.63015	11.9768	6.74246
NCU05005	2.04085	2.14889	7.13798	7.41644	5.84963	4.85352	2.09487	7.27721	5.35157
NCU05126	10.6948	8.1464	29.6819	15.5376	9.2892	15.1647	9.42062	22.6097	12.227
NCU05134	40.0475	35.3474	67.6969	69.1032	45.3202	50.8267	37.6975	68.4001	48.0735
NCU05148	25.4868	20.55	45.0326	47.7133	27.5398	36.8409	23.0184	46.3729	32.1904
NCU05151	6.14915	7.08771	11.5113	14.2985	10.503	9.73705	6.61843	12.9049	10.12
NCU05185	7.91692	7.84902	11.9617	14.3125	6.26813	7.30676	7.88297	13.1371	6.78744
NCU05534	4.3222	3.89177	9.83481	10.305	8.02017	5.71975	4.10698	10.0699	6.86996
NCU05542	26.915	27.1075	47.1138	42.1088	43.4477	36.9742	27.0113	44.6113	40.2109
NCU05605	17.905	14.6214	27.1052	23.0855	26.4643	22.9609	16.2632	25.0954	24.7126
NCU05834	0.651103	1.03875	4.91663	3.67936	2.3429	3.67046	0.844925	4.29799	3.00668
NCU06114	13.7452	15.9244	22.2645	29.2648	20.2632	19.5314	14.8348	25.7646	19.8973
NCU06131	11.361	11.7697	17.7266	20.2938	14.0378	15.8531	11.5654	19.0102	14.9455
NCU06137	28.4169	28.3295	78.724	68.5416	33.2555	34.8556	28.3732	73.6328	34.0556
NCU06153	3.94718	4.09489	6.88335	8.66337	6.27602	8.21642	4.02104	7.77336	7.24622
NCU06326	7.86384	7.10273	15.1159	15.2694	5.82036	7.69552	7.48329	15.1927	6.75794
NCU06371	10.5923	11.3494	18.3959	16.0913	15.8166	16.3964	10.9709	17.2436	16.1065
NCU06409	14.24	12.4735	22.4047	18.0327	18.7782	18.9995	13.3568	20.2187	18.8889
NCU06418	5.62612	6.1353	10.8887	9.50384	8.50527	10.192	5.88071	10.1963	9.34863
NCU06468	0.951429	1.20223	2.15601	1.457	1.68814	1.77886	1.07683	1.80651	1.7335
NCU06597	47.9762	53.1407	84.5033	84.3485	58.5594	67.1496	50.5585	84.4259	62.8545
NCU06890	18.298	17.5738	27.9946	31.7093	23.2814	30.1381	17.9359	29.852	26.7098
NCU07095	4.0595	4.00013	12.7875	12.4146	4.27263	4.9754	4.02982	12.6011	4.62401
NCU07138	4.68698	4.26922	13.9237	14.124	4.67611	4.73215	4.4781	14.0238	4.70413
NCU07266	17.4468	19.7234	33.4859	23.4382	26.5943	22.8983	18.5851	28.4621	24.7463
NCU07273	54.8621	57.1171	86.9006	93.737	59.3523	71.3936	55.9896	90.3188	65.373
NCU07310	7.90381	8.35474	13.2227	14.2487	15.8358	11.6338	8.12927	13.7357	13.7348
NCU07349	2.47946	3.19494	7.23142	5.86569	6.29508	4.0893	2.8372	6.54856	5.19219
NCU07353	4.67032	4.12902	13.4969	6.83479	6.76081	6.67561	4.39967	10.1658	6.71821
NCU07474	14.4475	13.7861	22.0819	25.6714	15.0898	18.5674	14.1168	23.8767	16.8286
NCU07569	606.51	583.678	939.67	1273.95	702.6	618.433	595.094	1106.81	660.517
NCU07795	9.79134	9.58898	19.9864	15.7886	18.7491	13.1258	9.69016	17.8875	15.9374
NCU08056	3.20903	3.29781	8.30934	7.15945	4.60441	4.85916	3.25342	7.73439	4.73179
NCU08057	7.96349	7.9253	13.9002	15.1323	12.088	13.4877	7.94439	14.5162	12.7879
NCU08413	16.3483	20.5023	37.3419	30.9533	15.5903	15.2524	18.4253	34.1476	15.4214
NCU08677	157.656	143.853	288.752	237.178	194.036	191.999	150.754	262.965	193.018
NCU08720	145.542	122.094	379.515	417.628	152.857	180.404	133.818	398.572	166.63
NCU08949	326.177	347.456	517.295	566.279	464.899	476.974	336.816	541.787	470.936
NCU09169	17.1308	15.5517	25.0694	26.7952	19.3306	20.8551	16.3412	25.9323	20.0928
NCU09277	2.22396	0.709606	5.9327	3.48024	2.80091	1.52117	1.46678	4.70647	2.16104
NCU09278	17.1207	15.3341	41.462	42.1911	19.641	21.9444	16.2274	41.8266	20.7927
NCU09532	10.6795	9.95932	16.9807	23.9827	11.4663	12.0243	10.3194	20.4817	11.7453
NCU09535	13.6795	15.9518	21.2244	24.2212	20.4181	21.3179	14.8156	22.7228	20.868
NCU09648	8.1832	6.77919	11.9285	11.456	12.0693	11.3402	7.4812	11.6923	11.7047
NCU09713	12.0724	8.98196	18.3204	15.8284	18.1249	11.9668	10.5272	17.0744	15.0458
NCU09714	11.3086	8.25683	20.7242	18.5529	13.8225	12.8117	9.78271	19.6385	13.3171
NCU09761	41.5162	35.6541	66.5398	55.9756	44.5863	44.4376	38.5851	61.2577	44.5119
NCU09775	47.1275	39.6221	66.031	80.0316	36.327	38.9296	43.3748	73.0313	37.6283
NCU10129	6.2653	7.07832	12.6992	12.2965	9.10866	7.78138	6.67181	12.4978	8.44502
NCU10572	89.4151	87.1892	151.222	128.341	90.2465	89.0889	88.3021	139.781	89.6677
NCU10836	7.59323	6.27241	12.2107	9.83305	9.57552	8.70913	6.93282	11.0219	9.14233
NCU10865	40.4188	42.8698	88.5543	102.97	20.2526	32.8842	41.6443	95.762	26.5684
NCU11046	13.2079	15.7431	29.2491	32.4353	18.5266	16.4148	14.4755	30.8422	17.4707
NCU11201	10.0274	10.738	18.8644	19.2266	15.4803	15.3219	10.3827	19.0455	15.4011
NCU11291	38.8035	40.7337	71.4708	68.2405	49.3577	48.5019	39.7686	69.8557	48.9298
NCU14015	10.7218	13.7503	31.8382	33.7832	19.86	17.2666	12.236	32.8107	18.5633
NCU14148	11.0581	9.95727	22.7224	27.1896	9.78147	11.4222	10.5077	24.956	10.6018
NCU14161	0.469148	0.588078	2.78114	5.18574	2.21207	1.48105	0.528613	3.98344	1.84656
NCU15745	0.46831	1.74329	4.24994	0.0603168	0.0301303	0.164267	1.1058	2.15513	0.0971986
NCU15752	0.135351	1.37118	4.41303	0.0353013	0.0470246	0.0284858	0.753266	2.22417	0.0377552
NCU17055	5.54926	3.92778	7.95382	8.40308	6.74334	8.03269	4.73852	8.17845	7.38802
NCU17240	5.12491	4.87765	8.61263	8.00878	7.39116	6.82096	5.00128	8.3107	7.10606
asd-1	62.6833	63.3092	132.43	168.057	66.8361	65.3592	62.9962	150.243	66.0976
ccg-14	1884.84	1691.15	3252.2	3854.88	2366	2336.7	1787.99	3553.54	2351.35
ccg-9	3.62965	4.207	8.63843	8.23754	4.19766	3.5979	3.91833	8.43799	3.89778
cut-1	74.8072	63.1175	112.708	96.0574	102.82	89.989	68.9624	104.383	96.4044
cys-4	37.6586	42.1845	65.5842	58.8759	63.8118	53.7124	39.9215	62.2301	58.7621
gh28-1	47.1825	49.3666	122.229	141.946	63.5044	64.5583	48.2746	132.087	64.0314
gh3-1	12.4117	12.9098	19.1958	20.5512	12.2566	14.5782	12.6608	19.8735	13.4174
hsp30-like_protein	132.516	126.024	240.84	225.852	122.833	161.714	129.27	233.346	142.273
lyz	17.6807	16.41	40.5853	43.7445	24.5076	23.5365	17.0454	42.1649	24.022
ncw-3	785.36	741.602	1378.74	1552.69	1055.61	971.361	763.481	1465.72	1013.48
ncw-6	28.3598	28.9096	47.4757	47.4269	41.2187	38.3369	28.6347	47.4513	39.7778
pin-c	6.16575	6.00846	10.9433	8.73133	7.06689	8.4447	6.08711	9.83733	7.75579
pod-5	5.40786	6.95843	10.7297	9.08269	9.35579	10.1874	6.18314	9.90621	9.77159
tca-3	91.1072	110.653	167.046	154.104	148.849	129.077	100.88	160.575	138.963
157 common elements in "CVW-1000LUX" and "CVW-5000LUX":
NCU00059	4.52703	4.59148	9.20681	7.05992	8.98557	8.10333	4.55925	8.13336	8.54445
NCU00115	14.148	13.6932	31.3115	22.4351	27.69	25.1704	13.9206	26.8733	26.4302
NCU00193	6.99513	7.41374	13.279	10.1471	13.6534	12.3441	7.20444	11.713	12.9987
NCU00264	5.85658	6.34689	16.4531	13.4233	16.5451	15.9674	6.10173	14.9382	16.2562
NCU00301	15.7083	14.6819	28.8648	22.2262	26.5295	29.8037	15.1951	25.5455	28.1666
NCU00336	3.09491	3.82809	6.72717	4.69036	6.47808	5.48423	3.4615	5.70877	5.98115
NCU00337	6.00856	5.85802	13.3619	8.78911	11.3986	11.5416	5.93329	11.0755	11.4701
NCU00399	316.233	296.725	1381.46	1473.51	578.535	538.63	306.479	1427.48	558.582
NCU00597	6.68975	6.30654	15.0217	9.25262	13.6859	12.2175	6.49815	12.1372	12.9517
NCU00650	7.89159	9.70562	15.4937	13.1039	15.7364	14.0853	8.7986	14.2988	14.9108
NCU00707	24.7851	20.6285	40.2778	31.9844	40.7524	39.3719	22.7068	36.1311	40.0621
NCU00794	5.4723	5.67324	10.8316	8.32963	10.3223	9.61686	5.57277	9.58061	9.96959
NCU00925	25.4156	28.8875	52.2064	42.6183	52.9253	49.0949	27.1516	47.4124	51.0101
NCU01013	8.98197	8.06855	15.4124	14.1899	17.5283	16.7262	8.52526	14.8012	17.1273
NCU01022	3.58948	2.86326	8.4569	6.21122	7.16472	6.26506	3.22637	7.33406	6.71489
NCU01063	22.204	20.7062	34.8795	45.9677	43.4274	33.5349	21.4551	40.4236	38.4812
NCU01104	5.26063	6.45283	9.05488	9.96675	13.0467	12.2378	5.85673	9.51081	12.6423
NCU01115	11.9997	11.9034	19.7478	16.4297	19.9621	18.3964	11.9515	18.0887	19.1793
NCU01257	24.9923	28.0818	60.8023	37.3577	51.8179	52.3158	26.537	49.08	52.0668
NCU01502	9.58172	7.71378	14.8671	12.3125	14.2807	14.9729	8.64775	13.5898	14.6268
NCU01503	10.9248	11.0384	19.7519	17.2252	18.1129	17.8464	10.9816	18.4886	17.9796
NCU01524	18.7497	17.1352	32.5954	26.6296	29.7835	28.2139	17.9424	29.6125	28.9987
NCU01612	10.2152	11.3542	19.1891	17.0629	19.3699	20.5607	10.7847	18.126	19.9653
NCU01638	8.695	10.2538	15.9587	12.4694	15.7508	15.0105	9.47441	14.214	15.3806
NCU01675	12.4326	12.3922	24.0863	18.619	22.5736	22.0359	12.4124	21.3527	22.3047
NCU01784	5.49119	5.07973	10.6857	7.42409	9.32133	8.83233	5.28546	9.05489	9.07683
NCU01786	16.8913	16.6368	28.8904	23.0373	27.4156	25.9175	16.7641	25.9638	26.6666
NCU01807	18.6936	17.6841	28.8297	28.466	30.875	26.0643	18.1889	28.6478	28.4696
NCU01809	7.5959	6.83937	10.691	10.9885	11.7614	12.239	7.21763	10.8397	12.0002
NCU01904	11.017	10.7714	16.645	19.5285	23.7922	17.1867	10.8942	18.0868	20.4894
NCU02066	14.8175	13.1524	24.5609	18.4133	22.8523	23.0866	13.9849	21.4871	22.9695
NCU02159	10.9545	9.50136	22.048	17.7787	19.9435	18.7508	10.2279	19.9134	19.3472
NCU02322	12.5318	13.3995	22.1551	23.8761	21.5611	19.4441	12.9656	23.0156	20.5026
NCU02494	2.73109	2.63513	5.24051	3.61603	4.55962	4.50305	2.68311	4.42827	4.53134
NCU02497	5.14544	5.09157	8.98344	8.38043	9.49273	8.95111	5.1185	8.68193	9.22192
NCU02511	12.9324	14.7841	28.8511	21.2089	26.5596	24.2058	13.8583	25.03	25.3827
NCU02533	19.3937	16.6601	35.7567	26.0833	31.0261	29.3328	18.0269	30.92	30.1794
NCU02546	13.4058	16.6878	27.9784	22.0727	27.5615	24.0574	15.0468	25.0255	25.8094
NCU02579	21.1648	16.2595	32.1554	27.8514	26.7927	29.6002	18.7122	30.0034	28.1965
NCU02596	17.1387	14.3471	33.9045	33.6506	29.4712	26.2622	15.7429	33.7775	27.8667
NCU02604	6.29171	6.80089	14.1149	10.2468	12.5658	12.263	6.5463	12.1809	12.4144
NCU02640	23.2655	20.4522	47.9017	33.5733	37.8493	39.0827	21.8589	40.7375	38.466
NCU02704	7.76543	6.40795	12.4548	11.4966	11.8794	12.3115	7.08669	11.9757	12.0955
NCU02729	10.98	10.2064	25.1061	15.9356	21.779	20.4438	10.5932	20.5208	21.1114
NCU03018	9.91442	9.22666	19.0282	13.8042	14.7977	15.4095	9.57054	16.4162	15.1036
NCU03051	5.97745	7.42643	11.5111	9.57704	10.1654	10.4509	6.70194	10.544	10.3082
NCU03061	23.0701	24.4737	46.2749	39.3292	46.5628	41.3601	23.7719	42.8021	43.9615
NCU03066	12.1753	12.9325	28.695	23.6508	28.0166	27.9151	12.5539	26.1729	27.9659
NCU03092	48.4508	48.4636	118.722	77.9105	125.777	113.282	48.4572	98.3162	119.529
NCU03133	9.20691	7.54033	16.6545	15.011	16.1123	17.6231	8.37362	15.8327	16.8677
NCU03321	15.2865	15.303	33.6222	25.0177	28.321	28.8369	15.2947	29.3199	28.579
NCU03560	7.52671	8.12562	14.1274	10.3319	12.5506	12.6646	7.82617	12.2297	12.6076
NCU03603	26.4976	26.0521	51.2062	40.4618	46.1144	42.1492	26.2748	45.834	44.1318
NCU03669	14.8156	15.2541	29.7125	22.5921	26.8057	28.8564	15.0349	26.1523	27.8311
NCU03702	74.6879	75.7124	121.642	107.334	136.076	127.51	75.2002	114.488	131.793
NCU03794	6.77763	7.02251	12.7591	10.6189	12.4193	12.9451	6.90007	11.689	12.6822
NCU04041	7.4199	7.08637	13.4816	11.1315	12.8309	10.8178	7.25314	12.3066	11.8244
NCU04150	24.7659	19.105	38.2643	31.2775	37.858	30.3867	21.9354	34.7709	34.1223
NCU04165	13.0509	13.2718	28.1265	20.9893	22.1188	20.2655	13.1614	24.5579	21.1921
NCU04348	8.57483	8.46321	16.9789	12.2303	15.1204	15.2616	8.51902	14.6046	15.191
NCU04439	6.22908	5.87698	10.9751	10.5905	11.6542	10.5425	6.05303	10.7828	11.0984
NCU04478	0.905049	1.13214	2.80453	2.43202	2.28683	3.33333	1.01859	2.61828	2.81008
NCU04485	9.43962	8.78717	19.8386	14.42	17.4714	15.946	9.1134	17.1293	16.7087
NCU04503	22.6796	18.7877	35.7917	31.0427	33.2686	32.0858	20.7336	33.4172	32.6772
NCU04620	13.2987	12.6365	24.9502	21.2429	23.1778	19.3151	12.9676	23.0965	21.2464
NCU04647	16.0693	19.2788	38.6714	31.5033	29.6802	28.4544	17.674	35.0873	29.0673
NCU04667	4.06553	3.43061	10.4569	11.5966	8.9447	6.43489	3.74807	11.0268	7.68979
NCU04765	13.2814	12.1326	20.4568	19.5006	24.1169	25.1446	12.707	19.9787	24.6307
NCU04787	4.92316	5.63732	10.2971	7.88711	8.89705	9.73456	5.28024	9.09209	9.31581
NCU04823	10.3286	9.95836	16.5938	16.2932	21.3746	17.1064	10.1435	16.4435	19.2405
NCU04908	15.5829	16.1708	27.1213	28.5061	24.1559	24.5968	15.8768	27.8137	24.3763
NCU04949	28.9669	23.3292	60.2352	54.8064	50.7353	58.8642	26.148	57.5208	54.7997
NCU04988	11.5463	10.0726	20.2705	17.3567	19.578	20.9117	10.8094	18.8136	20.2448
NCU05233	12.8263	11.764	21.0798	16.9433	19.6151	20.4294	12.2952	19.0115	20.0223
NCU05235	28.7597	25.3851	48.5481	39.4772	43.0054	40.4835	27.0724	44.0127	41.7444
NCU05252	27.3731	26.3904	43.2122	39.2887	44.9514	42.1524	26.8817	41.2504	43.5519
NCU05289	22.4719	24.383	44.267	36.9496	40.2642	37.5269	23.4275	40.6083	38.8955
NCU05301	20.701	22.3913	36.8839	30.0608	32.9638	32.7391	21.5462	33.4724	32.8515
NCU05417	4.32725	3.91055	7.27895	7.78595	8.11172	7.39231	4.1189	7.53245	7.75202
NCU05512	59.0536	44.5249	328.74	167.004	211.6	214.059	51.7893	247.872	212.83
NCU05650	16.5962	16.6976	33.3756	27.5433	33.1072	30.1223	16.6469	30.4594	31.6148
NCU05652	9.82938	8.18728	25.1105	23.9367	19.2919	19.2011	9.00833	24.5236	19.2465
NCU05782	21.788	20.5077	39.504	30.1595	37.7817	33.9034	21.1479	34.8318	35.8425
NCU05844	13.9638	14.5013	41.1289	42.6039	27.6439	31.8279	14.2326	41.8664	29.7359
NCU05850	62.5723	59.9722	122.04	110.192	118.797	113.778	61.2723	116.116	116.287
NCU05894	7.38497	7.05049	13.8747	11.1724	13.8893	12.7582	7.21773	12.5236	13.3238
NCU06118	6.40644	5.66483	10.518	7.67897	9.02148	9.45241	6.03563	9.09847	9.23694
NCU06214	28.3683	26.0685	48.8812	35.2514	42.7418	46.3699	27.2184	42.0663	44.5559
NCU06217	11.1337	8.50836	19.6256	15.4261	18.3839	17.1261	9.82105	17.5259	17.755
NCU06485	14.6963	14.19	24.2615	19.63	24.4186	24.7145	14.4432	21.9457	24.5666
NCU06506	10.692	12.3728	17.4638	24.5641	19.3092	18.501	11.5324	21.0139	18.9051
NCU06780	9.12149	9.80954	29.9065	20.4564	25.9042	24.6586	9.46551	25.1815	25.2814
NCU06977	119.202	119.008	216.605	238.088	193.706	191.384	119.105	227.346	192.545
NCU07041	11.5158	9.98004	22.5162	17.7074	19.7941	17.271	10.7479	20.1118	18.5326
NCU07070	7.23997	7.70026	12.8574	11.5556	14.3988	12.9321	7.47011	12.2065	13.6655
NCU07142	21.5917	19.242	38.8354	41.6622	34.1872	34.9029	20.4169	40.2488	34.5451
NCU07332	6.40947	8.36463	12.9114	13.8027	12.3538	13.2748	7.38705	13.357	12.8143
NCU07393	6.2982	5.59505	10.7344	8.94084	10.3526	10.7406	5.94663	9.83762	10.5466
NCU07528	13.4418	13.7213	24.1049	20.6658	22.5075	24.5247	13.5815	22.3853	23.5161
NCU07547	20.1557	19.3138	40.6486	28.8809	40.34	33.4784	19.7347	34.7647	36.9092
NCU07712	6.70896	7.15836	13.5828	11.067	13.5221	12.5206	6.93366	12.3249	13.0213
NCU07921	10.5871	11.5206	35.9154	36.6573	21.5805	26.9182	11.0538	36.2863	24.2494
NCU07942	8.319	8.2879	19.5945	12.2065	17.6525	17.1018	8.30345	15.9005	17.3771
NCU07956	9.94126	8.3645	17.4107	13.1417	18.9963	19.088	9.15288	15.2762	19.0421
NCU08064	9.06758	7.70747	13.6417	13.3163	13.2879	12.7095	8.38752	13.479	12.9987
NCU08121	12.6716	13.6078	29.9639	20.568	28.75	24.1937	13.1397	25.2659	26.4719
NCU08295	26.3312	27.0918	46.3819	36.1405	41.2009	44.5966	26.7115	41.2612	42.8988
NCU08323	14.3393	14.8734	27.9898	24.5278	28.3869	24.9119	14.6063	26.2588	26.6494
NCU08421	18.1556	13.3367	30.2884	21.1691	28.7514	27.1109	15.7462	25.7287	27.9311
NCU08518	17.6145	20.3413	35.5106	30.8196	36.3388	29.5227	18.9779	33.1651	32.9308
NCU08549	24.9974	26.3659	45.0208	50.1471	43.6909	45.1676	25.6816	47.584	44.4292
NCU08595	17.1699	16.4971	31.7525	27.5777	31.8425	29.0902	16.8335	29.6651	30.4663
NCU08663	14.2567	14.5341	28.3971	24.2657	29.1278	28.1265	14.3954	26.3314	28.6272
NCU08707	10.2718	9.4931	18.4197	16.9161	20.3197	19.3086	9.88247	17.6679	19.8141
NCU08951	62.1049	60.6012	115.554	88.7772	112.248	103.383	61.3531	102.166	107.816
NCU09057	26.6152	23.2503	59.1523	65.2334	64.5372	59.626	24.9327	62.1929	62.0816
NCU09131	12.7887	12.9709	25.2363	20.0826	24.0191	20.6728	12.8798	22.6595	22.346
NCU09210	32.3229	31.5904	58.3212	52.0589	72.5292	67.3438	31.9567	55.1901	69.9365
NCU09349	14.9814	13.1487	24.5002	19.1968	24.8808	23.041	14.0651	21.8485	23.9609
NCU09352	9.30497	10.6098	17.3623	14.6405	16.5483	17.299	9.95737	16.0014	16.9236
NCU09380	12.1598	11.831	25.6623	19.152	25.3701	26.2227	11.9954	22.4072	25.7964
NCU09488	8.26567	8.94715	17.8435	12.9503	15.1614	15.5628	8.60641	15.3969	15.3621
NCU09497	31.2583	35.1302	59.0553	47.2274	76.1481	67.101	33.1943	53.1413	71.6245
NCU09499	6.99594	6.56049	13.3642	9.03887	12.2652	12.0565	6.77822	11.2015	12.1609
NCU09528	10.0611	10.4157	19.4737	15.3908	18.2177	18.1951	10.2384	17.4322	18.2064
NCU09533	17.315	17.4466	30.4846	40.2251	27.2515	29.6186	17.3808	35.3548	28.4351
NCU09692	8.61168	8.57882	17.8011	20.2006	18.6306	14.47	8.59525	19.0008	16.5503
NCU09864	9.0151	7.90121	18.5582	16.1711	17.1472	15.2025	8.45816	17.3647	16.1749
NCU09903	9.88599	10.9056	20.999	16.7286	19.5314	20.8857	10.3958	18.8638	20.2085
NCU09904	24.4658	20.8473	47.6143	59.5488	27.1408	42.5308	22.6566	53.5816	34.8358
NCU09906	23.5262	21.5692	59.2962	65.7708	30.073	40.3843	22.5477	62.5335	35.2287
NCU10031	7.7616	7.1438	15.5952	21.0543	12.3486	13.2329	7.4527	18.3248	12.7908
NCU10220	13.7225	9.58231	26.2064	17.9523	22.924	20.9451	11.6524	22.0793	21.9346
NCU11175	7.64309	7.14662	19.4897	12.9311	18.5108	15.8353	7.39486	16.2104	17.1731
NCU11307	4.17935	2.64037	21.0096	9.30161	13.2424	11.8216	3.40986	15.1556	12.532
NCU11321	15.8782	13.3066	31.9842	21.7887	28.885	29.388	14.5924	26.8865	29.1365
NCU16742	43.7555	42.873	73.8292	75.0818	86.483	74.4435	43.3142	74.4555	80.4632
NCU17100	80.1197	84.4049	412.36	246.79	294.104	264.991	82.2623	329.575	279.548
acd-1	5.25905	6.85858	12.9281	10.6138	13.3229	10.1678	6.05881	11.771	11.7453
ad-7	10.3857	13.7164	23.3782	19.0521	24.5517	20.3456	12.051	21.2151	22.4486
aod-2	6.14326	6.06903	10.9056	7.9461	9.12443	10.4764	6.10614	9.42583	9.80042
bli-3	107.223	103.916	148.918	177.475	177.07	191.679	105.569	163.197	184.375
ccg-1	741.681	644.344	1005.55	1124.13	1128.17	1176.91	693.012	1064.84	1152.54
ccg-13	655.395	531.923	2231.74	2786.97	1435.97	1234.53	593.659	2509.35	1335.25
cdt-1	6.85158	8.48238	12.6622	11.0533	13.0772	12.9962	7.66698	11.8577	13.0367
cyt-18	7.79888	8.05446	13.9073	11.9618	13.589	12.9606	7.92667	12.9345	13.2748
fkr-4	52.7677	50.5748	89.3091	74.0969	86.9793	79.733	51.6712	81.703	83.3562
leu-2	37.3639	39.4605	62.8441	58.4498	61.0491	61.5381	38.4122	60.647	61.2936
mig-2	10.7536	10.1876	21.0549	18.6766	21.5232	19.7577	10.4706	19.8658	20.6405
naf-2	15.9885	11.9472	25.5769	21.0545	26.2833	23.5792	13.9679	23.3157	24.9313
ncw-5	47.8912	39.5699	184.648	239.486	120.485	95.8373	43.7306	212.067	108.161
nic-7	19.4696	16.2256	30.427	27.7933	32.8318	29.092	17.8476	29.1101	30.9619
ota	23.4372	21.9034	47.0148	36.9952	35.1249	35.1146	22.6703	42.005	35.1198
prm-1	37.1599	44.5837	74.5813	63.7604	80.4366	78.0593	40.8718	69.1708	79.248
prm-3	10.3567	9.61874	22.4992	19.0306	22.5527	21.2441	9.98774	20.7649	21.8984
rRNA_biogenesis_protein_RRP5	7.59906	7.88614	15.737	11.9701	13.6907	14.1957	7.7426	13.8536	13.9432
sre	4.44843	4.29059	10.8728	8.12654	8.8513	8.26071	4.36951	9.49969	8.55601
73 elements included exclusively in "CVW-5000LUX":
37S_ribosomal_protein_Rsm22	7.73511	8.11107	11.2929	10.0806	13.6848	12.8338	7.92309	10.6867	13.2593
NCU00151	4.74524	3.95553	9.11884	5.75495	8.20191	8.58865	4.35039	7.4369	8.39528
NCU00285	6.21884	6.8157	8.41612	8.42782	13.2994	14.7929	6.51727	8.42197	14.0462
NCU00298	6.65665	8.84213	6.8056	6.06393	11.5132	13.8573	7.74939	6.43476	12.6852
NCU00372	4.45914	5.09217	7.35978	6.89437	7.85061	7.03399	4.77565	7.12707	7.4423
NCU00591	6.24091	5.89658	8.80014	9.00774	10.9334	8.89453	6.06875	8.90394	9.91397
NCU00838	17.6569	18.6861	25.9696	27.474	31.8052	27.7385	18.1715	26.7218	29.7719
NCU00985	19.8195	13.8482	17.9622	22.1094	25.9953	25.965	16.8338	20.0358	25.9802
NCU00992	7.12608	8.0548	10.3565	8.59882	15.3068	13.7996	7.59044	9.47765	14.5532
NCU01068	17.9278	15.9027	24.2118	24.3321	24.1974	27.4158	16.9152	24.272	25.8066
NCU01157	15.3633	17.5361	22.828	20.4235	25.2969	25.8724	16.4497	21.6258	25.5847
NCU01290	46.2229	43.1783	65.4394	54.0635	69.6524	67.6073	44.7006	59.7515	68.6298
NCU01367	18.6334	16.5644	25.0047	22.9534	27.3605	26.339	17.5989	23.979	26.8498
NCU01417	5.11769	5.67767	7.77339	7.86283	9.05617	8.29464	5.39768	7.81811	8.67541
NCU01486	8.13313	8.3663	9.65261	9.38722	13.643	12.6749	8.24972	9.51992	13.159
NCU01780	5.40097	3.20726	8.63678	6.95629	8.25288	8.60934	4.30412	7.79653	8.43111
NCU01806	11.3796	13.0674	18.2856	18.0687	19.92	18.6595	12.2235	18.1772	19.2898
NCU02468	35.6581	29.4495	46.8286	42.6576	49.8701	52.856	32.5538	44.7431	51.363
NCU02611	12.1265	13.0249	19.8896	17.3486	20.2883	19.4521	12.5757	18.6191	19.8702
NCU02887	58.0588	73.1554	86.6663	105.306	103.276	97.0699	65.6071	95.9861	100.173
NCU03380	6.48644	5.74568	11.7554	6.55718	12.5289	10.2782	6.11606	9.15631	11.4035
NCU04273	10.2789	9.3355	17.5438	12.1765	16.9487	18.2856	9.80722	14.8601	17.6172
NCU04283	15.0026	11.0032	21.7775	19.2863	22.912	23.9427	13.0029	20.5319	23.4274
NCU04470	14.9613	17.1557	24.5941	20.5758	27.3341	22.937	16.0585	22.5849	25.1356
NCU04622	20.3236	15.4228	23.826	21.1904	30.9888	33.7524	17.8732	22.5082	32.3706
NCU04698	15.4996	17.335	17.6774	18.7183	24.4979	26.4645	16.4173	18.1979	25.4812
NCU04699	38.6123	45.6584	49.3799	48.8821	75.0384	76.7892	42.1353	49.131	75.9138
NCU04799	54.2889	59.3232	81.0465	78.1824	90.9805	86.2406	56.8061	79.6145	88.6105
NCU04848	8.44811	7.77189	10.6519	9.28352	14.5952	13.6918	8.11	9.96769	14.1435
NCU05392	4.17514	4.0292	6.77773	4.82652	7.07493	6.41665	4.10217	5.80213	6.74579
NCU06005	4.54842	5.00824	5.26584	6.23469	9.02823	8.88252	4.77833	5.75027	8.95538
NCU06090	13.7547	11.7611	18.4008	15.1288	22.0233	22.0682	12.7579	16.7648	22.0458
NCU06380	30.7129	28.8174	38.9242	37.5929	45.0042	47.8509	29.7651	38.2586	46.4275
NCU06496	2.63011	2.84036	5.00727	3.35949	5.09604	5.63112	2.73524	4.18338	5.36358
NCU06520	4.86225	4.91195	8.10667	5.95136	8.93261	9.30737	4.8871	7.02902	9.11999
NCU06697	14.0718	13.621	22.0768	18.6858	22.8262	20.8762	13.8464	20.3813	21.8512
NCU06783	316.004	313.609	407.259	418.322	470.686	480.38	314.807	412.791	475.533
NCU06943	42.2999	39.6059	59.7359	53.7418	66.7636	60.6966	40.9529	56.7388	63.7301
NCU07082	8.39704	7.27754	8.4978	10.2801	15.4943	11.4374	7.83729	9.38896	13.4659
NCU07314	3.82804	4.46371	5.31864	4.4258	7.63113	7.34313	4.14587	4.87222	7.48713
NCU07661	4.25835	2.84686	6.85189	5.95866	7.99617	10.9252	3.5526	6.40527	9.4607
NCU07740	7.17201	5.77707	9.95748	9.04714	11.0541	11.4686	6.47454	9.50231	11.2613
NCU07839	45.6956	42.0701	68.9197	57.3112	72.3665	74.8866	43.8829	63.1155	73.6265
NCU07922	153.566	155.822	240.769	209.645	258.458	250.12	154.694	225.207	254.289
NCU08167	14.9095	17.0488	22.4905	21.2899	28.4943	22.5448	15.9791	21.8902	25.5195
NCU08324	11.1714	11.1763	17.2022	16.0137	18.0757	19.0292	11.1738	16.608	18.5524
NCU08535	25.8401	24.9733	30.0484	26.2937	38.4682	38.8694	25.4067	28.1711	38.6688
NCU08904	14.3156	11.3162	19.199	17.2981	19.8182	20.9105	12.8159	18.2486	20.3643
NCU08923	214.128	212.29	314.179	304.519	405.268	391.349	213.209	309.349	398.309
NCU08968	4.19225	4.75889	9.05397	7.63976	10.1068	9.52996	4.47557	8.34686	9.81839
NCU09091	5.2819	4.89695	8.80266	7.03526	9.22732	8.78814	5.08943	7.91896	9.00773
NCU09137	4.95387	3.8984	7.25108	5.72789	7.9681	8.16168	4.42613	6.48948	8.06489
NCU09209	14.7893	13.7705	17.1448	19.1538	29.3657	25.0702	14.2799	18.1493	27.2179
NCU09437	3.37322	4.46225	7.12811	4.99899	6.98581	6.93503	3.91773	6.06355	6.96042
NCU09771	3.34135	4.74025	5.16087	5.01922	7.01668	10.4147	4.0408	5.09005	8.71571
NCU09782	7.21205	6.95308	10.8904	8.21783	10.767	11.7538	7.08257	9.55409	11.2604
NCU09858	8.99942	8.46109	11.1015	10.9535	13.9485	13.1661	8.73025	11.0275	13.5573
NCU12112	4.85892	4.40881	7.86109	5.96674	8.30872	9.52301	4.63386	6.91392	8.91586
NCU15759	0.435407	1.77132	0.107547	0.22712	15.9781	0	1.10336	0.167334	7.98907
NCU16725	8.61937	7.83393	10.9074	10.0973	14.1563	10.9025	8.22665	10.5024	12.5294
NCU16757	50.1856	43.9686	69.5339	58.2525	76.0705	67.0549	47.0771	63.8932	71.5627
NCU16769	16.231	17.0045	26.4713	23.3773	26.7885	26.8641	16.6178	24.9243	26.8263
NCU16779	7.61736	8.75452	12.5133	10.5045	12.7463	12.4863	8.18594	11.5089	12.6163
cel-1	62.1782	70.8223	91.5749	88.9575	112.295	122.068	66.5003	90.2662	117.181
cel-2	73.4054	76.7405	94.2134	92.2327	114.718	124.705	75.073	93.2231	119.712
col-20	5.55135	7.9799	8.50214	7.86588	12.4324	13.3202	6.76562	8.18401	12.8763
cyt-19	16.6506	16.6525	24.8007	20.6129	27.3223	27.1378	16.6515	22.7068	27.23
cyt-2	21.5977	18.7508	29.3408	23.2099	30.6256	31.7377	20.1742	26.2754	31.1817
mig-3	25.3336	24.9489	32.6876	30.8105	42.5092	37.1777	25.1412	31.7491	39.8435
poli	7.51421	8.11909	12.891	9.84359	12.8307	11.9327	7.81665	11.3673	12.3817
stk-52	12.8738	12.457	19.1161	18.8646	21.8774	20.7918	12.6654	18.9903	21.3346
tzn-1	3.74941	3.89131	6.73176	6.09871	8.47421	7.50916	3.82036	6.41523	7.99168
un-18	6.47877	7.86736	11.8211	9.33722	11.1373	11.0279	7.17307	10.5791	11.0826
