# Supplementary material for: The Resonance and Adaptation of Neurospora crassa Circadian and Conidiation Rhyth ms to Short Light-Dark Cycles
Source: J Fungi (Basel). 2021 Dec 29;8(1):27. doi: 10.3390/jof8010027 (PMC8780863; doi:10.3390/jof8010027)
Supplement: Supplementary file 1 [file jof-08-00027-s001.zip › File S3.xls]

## Sheet: Genes induced in 1000 lux only 
KEGG Pathway Annotation Analysis of genes exclusively induced in 1000 lux light.
#Term	ID	Input number	Background number	P-Value	GeneList	Hyperlink
Ribosome biogenesis in eukaryotes	ncr03008	4	62	0.00645802	NCU01331,NCU01008,NCU06468,pod-5,	http://www.genome.jp/kegg-bin/show_pathway?ncr03008/ncr:NCU03628%09red/ncr:NCU06468%09red/ncr:NCU01008%09red/ncr:NCU01331%09red
Pentose and glucuronate interconversions	ncr00040	2	18	0.0209694	gh28-1,NCU09532,	http://www.genome.jp/kegg-bin/show_pathway?ncr00040/ncr:NCU09532%09red/ncr:NCU02369%09red

## Sheet: Genes induced in 1000,5000 lux
KEGG Pathway Annotation Analysis of genes induced in 1000 lux and 5000 lux light.
#Term	ID	Input number	Background number	P-Value	GeneList	Hyperlink
Ribosome biogenesis in eukaryotes	ncr03008	18	62	1.10166e-16	NCU05289,NCU00336,NCU03066,NCU01809,NCU02604,NCU03702,NCU10220,NCU00650,NCU03051,NCU05894,NCU08421,NCU03018,NCU08951,NCU08663,NCU04348,NCU06217,NCU02546,NCU03794,	http://www.genome.jp/kegg-bin/show_pathway?ncr03008/ncr:NCU08421%09red/ncr:NCU10220%09red/ncr:NCU08951%09red/ncr:NCU06217%09red/ncr:NCU03794%09red/ncr:NCU05894%09red/ncr:NCU08663%09red/ncr:NCU00650%09red/ncr:NCU03018%09red/ncr:NCU05289%09red/ncr:NCU04348%09red/ncr:NCU03702%09red/ncr:NCU03051%09red/ncr:NCU02546%09red/ncr:NCU03066%09red/ncr:NCU00336%09red/ncr:NCU01809%09red/ncr:NCU02604%09red
Purine metabolism	ncr00230	7	82	0.000397508	NCU03560,NCU10220,NCU02533,NCU01786,NCU06485,ad-7,NCU01638,	http://www.genome.jp/kegg-bin/show_pathway?ncr00230/ncr:NCU10220%09red/ncr:NCU03560%09red/ncr:NCU06485%09red/ncr:NCU02533%09red/ncr:NCU01638%09red/ncr:NCU01786%09red/ncr:NCU04216%09red
RNA polymerase	ncr03020	4	27	0.00117318	NCU01638,NCU03560,NCU02533,NCU06485,	http://www.genome.jp/kegg-bin/show_pathway?ncr03020/ncr:NCU06485%09red/ncr:NCU03560%09red/ncr:NCU02533%09red/ncr:NCU01638%09red
Pentose and glucuronate interconversions	ncr00040	3	18	0.00374549	NCU01904,NCU09533,NCU04823,	http://www.genome.jp/kegg-bin/show_pathway?ncr00040/ncr:NCU01904%09red/ncr:NCU04823%09red/ncr:NCU09533%09red
Biosynthesis of secondary metabolites	ncr01110	10	276	0.0118892	NCU02704,NCU09864,NCU02322,NCU10220,ota,NCU04823,NCU01786,ad-7,leu-2,NCU01013,	http://www.genome.jp/kegg-bin/show_pathway?ncr01110/ncr:NCU10220%09red/ncr:NCU02704%09red/ncr:NCU04216%09red/ncr:NCU02322%09red/ncr:NCU09864%09red/ncr:NCU01786%09red/ncr:NCU00194%09red/ncr:NCU04823%09red/ncr:NCU01013%09red/ncr:NCU04385%09red
Pyrimidine metabolism	ncr00240	4	64	0.0197114	NCU01638,NCU03560,NCU02533,NCU06485,	http://www.genome.jp/kegg-bin/show_pathway?ncr00240/ncr:NCU06485%09red/ncr:NCU03560%09red/ncr:NCU02533%09red/ncr:NCU01638%09red
Biosynthesis of antibiotics	ncr01130	7	207	0.0447265	NCU02704,NCU09864,NCU10220,ota,NCU04823,NCU01786,ad-7,	http://www.genome.jp/kegg-bin/show_pathway?ncr01130/ncr:NCU10220%09red/ncr:NCU02704%09red/ncr:NCU04216%09red/ncr:NCU01786%09red/ncr:NCU00194%09red/ncr:NCU04823%09red/ncr:NCU09864%09red
Propanoate metabolism	ncr00640	2	21	0.0471321	NCU02704,NCU09864,	http://www.genome.jp/kegg-bin/show_pathway?ncr00640/ncr:NCU09864%09red/ncr:NCU02704%09red

## Sheet: Genes induced only in 5000 lux
KEGG Pathway Annotation Analysis of genes exclusively induced in 5000 lux light.
#Term	ID	Input number	Background number	P-Value	GeneList	Hyperlink
Fatty acid biosynthesis	ncr00061	3	11	0.000119355	cel-2,NCU08535,cel-1,	http://www.genome.jp/kegg-bin/show_pathway?ncr00061/ncr:NCU08535%09red/ncr:NCU07307%09red/ncr:NCU07308%09red
Ribosome biogenesis in eukaryotes	ncr03008	4	62	0.00122411	NCU01290,NCU06943,NCU09437,NCU08904,	http://www.genome.jp/kegg-bin/show_pathway?ncr03008/ncr:NCU01290%09red/ncr:NCU08904%09red/ncr:NCU09437%09red/ncr:NCU06943%09red
Fatty acid metabolism	ncr01212	3	27	0.0012267	cel-2,NCU08535,cel-1,	http://www.genome.jp/kegg-bin/show_pathway?ncr01212/ncr:NCU08535%09red/ncr:NCU07307%09red/ncr:NCU07308%09red
Propanoate metabolism	ncr00640	2	21	0.0114976	NCU08535,NCU01417,	http://www.genome.jp/kegg-bin/show_pathway?ncr00640/ncr:NCU08535%09red/ncr:NCU01417%09red
Metabolic pathways	ncr01100	11	712	0.0128164	NCU01157,NCU06005,NCU06783,cel-1,un-18,cel-2,NCU08535,NCU01417,NCU00591,NCU04699,NCU02468,	http://www.genome.jp/kegg-bin/show_pathway?ncr01100/ncr:NCU07307%09red/ncr:NCU04699%09red/ncr:NCU06005%09red/ncr:NCU06783%09red/ncr:NCU01157%09red/ncr:NCU00591%09red/ncr:NCU07308%09red/ncr:NCU08535%09red/ncr:NCU02468%09red/ncr:NCU08616%09red/ncr:NCU01417%09red
